# Supplementary material for: Hydrogenation/oxidation triggered highly efficient reversible color switching of organic molecules
Source: Royal Society of Chemistry journal article supplement (doi:10.1039/c6cy02585d), 2017-01-01
Supplement: c6cy02585d1.pdf [file c6cy02585d1.pdf]

## Supporting Information

### **Hydrogenation/oxidation triggered highly efficient reversible color switching of organic molecules**

*Xiao Zhou, Yi-Fan Jiang, Hong-Li Guo, Xin Wang, Ya-Nan Liu, M. Imran  
and An-Wu Xu\**

*Division of Nanomaterials and Chemistry, Hefei National Laboratory for Physical  
Sciences at Microscale, University of Science and Technology of China, Hefei  
230026, China.*

*\*To whom correspondence should be addressed.  
Email: [anwuxu@ustc.edu.cn](mailto:anwuxu@ustc.edu.cn)*

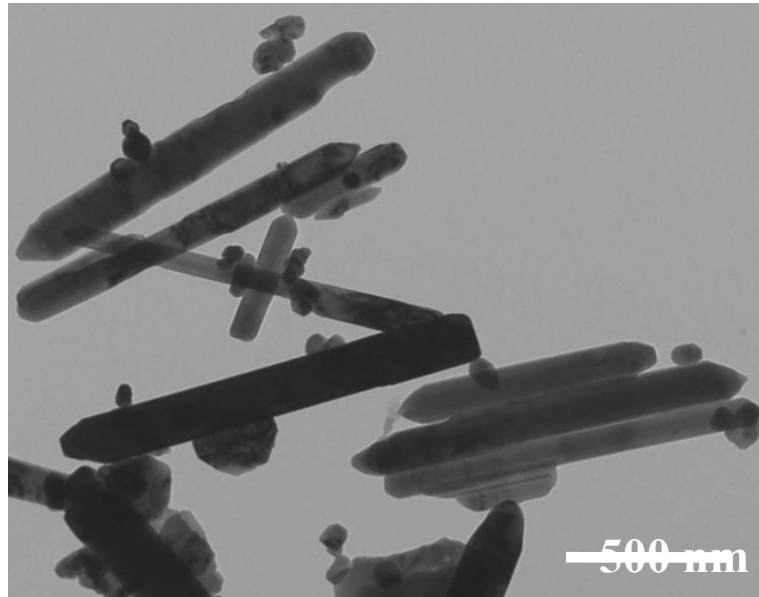

**Fig. S1** TEM image of obtained ZnO<sub>1-x</sub> nanorods.

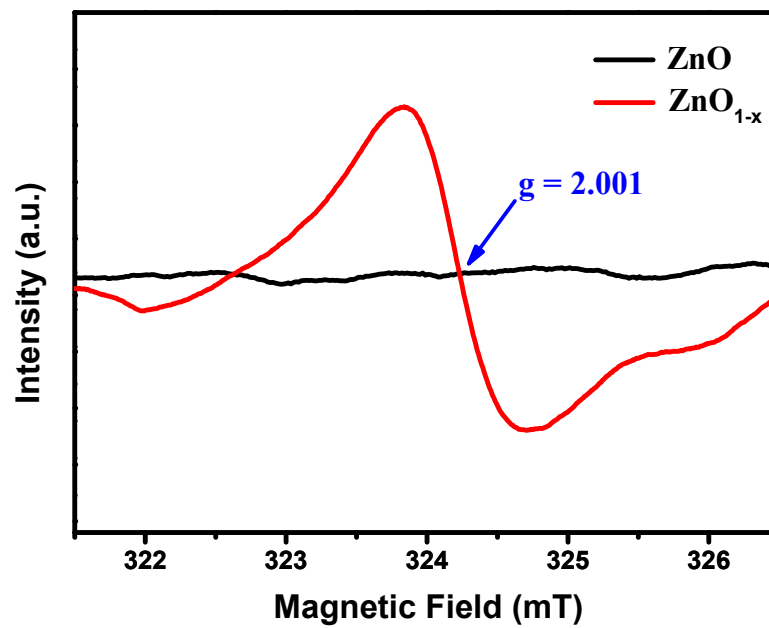

**Fig. S2** The X-band EPR spectra of the ZnO<sub>1-x</sub> nanorods and commercial ZnO sample recorded at  $T = 140$  K.

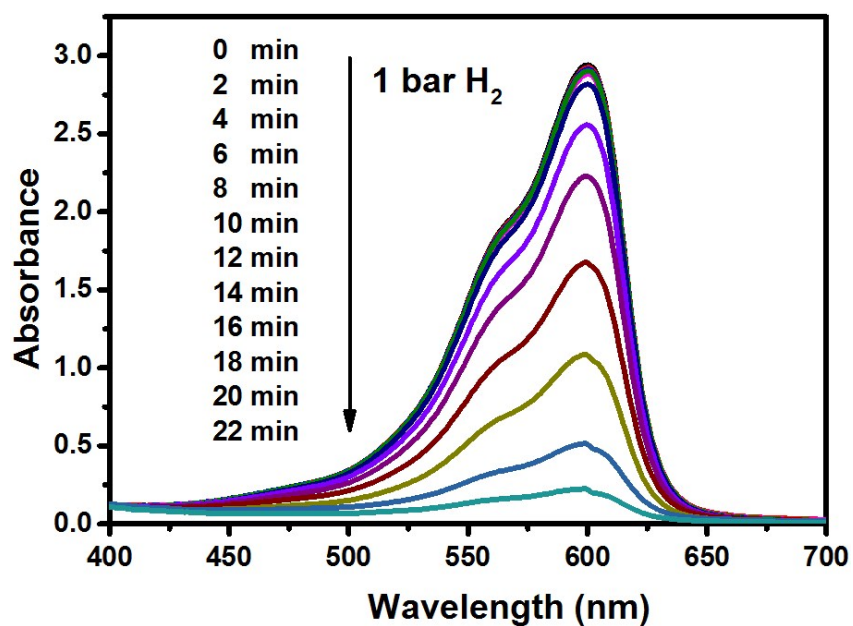

**Fig. S3** UV-vis spectra of Pd-ZnO (commercial ZnO without oxygen vacancies) showing the hydrogenation process under 1 bar H<sub>2</sub> and room temperature.

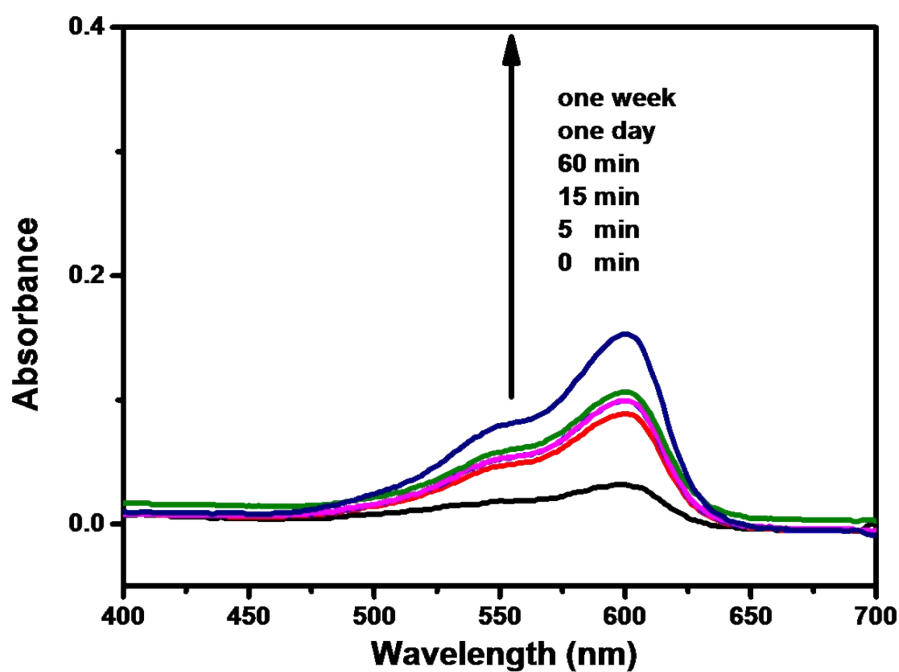

**Fig. S4** The UV-vis spectra of HEC stabilized LTH solution after catalyst removed exposing to air for different time.

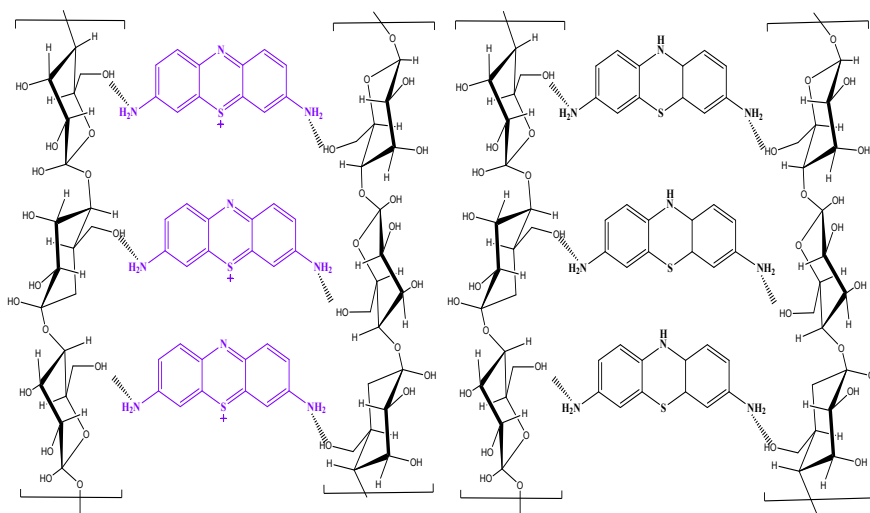

**Fig. S5** Illustration of HEC stabilized of TH<sup>+</sup> and LTH.

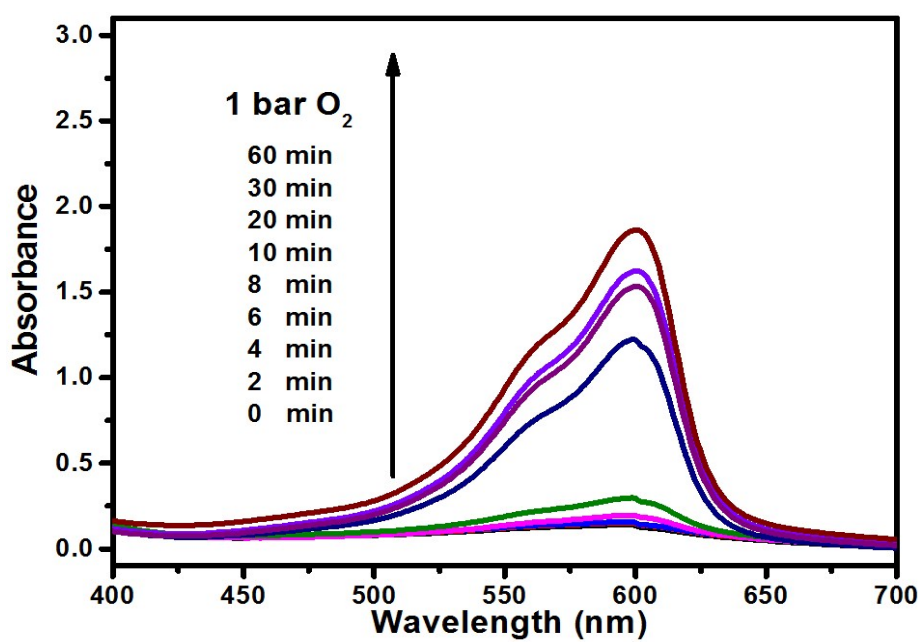

**Fig. S6** UV-vis spectra of Pd-ZnO (commercial ZnO without oxygen vacancies) showing the oxidative dehydrogenation process under 1 bar O<sub>2</sub> and room temperature.

**Table 1** The switching behavior change with the concentration of Pd-ZnO<sub>1-x</sub>

| Entry | Amounts of Pd-ZnO <sub>1-x</sub> (mg) | Time of color fading (min) | Time of color recovery (min) |
|-------|---------------------------------------|----------------------------|------------------------------|
| 1     | 0.125                                 | 2.8                        | 4.2                          |
| 2     | 0.25                                  | 2.2                        | 3.3                          |
| 3     | 0.5                                   | 2.1                        | 3.1                          |

Reaction condition: various amounts of 1 wt% Pd-ZnO<sub>1-x</sub> catalyst, 30  $\mu$ L TH<sup>+</sup>/HEC/Pd-ZnO<sub>1-x</sub> mixture for one drop, 1 bar H<sub>2</sub>/O<sub>2</sub>.

**Table 2** The switching behavior change with the drop volume of TH<sup>+</sup>/HEC/Pd-ZnO<sub>1-x</sub> mixture.

| Volume of drop ( $\mu$ L) | Purple color (TH <sup>+</sup> )                                                     | Colorless leuco-thionin (LTH)                                                       | Time of color fading (min) | Time of color recovery (min) |
|---------------------------|-------------------------------------------------------------------------------------|-------------------------------------------------------------------------------------|----------------------------|------------------------------|
| 10                        | 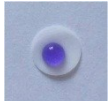 |  | 1.5                        | 2.1                          |
| 30                        |  |  | 2.2                        | 3.3                          |
| 50                        |  |  | 5.3                        | 7.2                          |
| 100                       |  |  | 8.8                        | 10.2                         |

Reaction condition: 0.25 mg of 1 wt% Pd-ZnO<sub>1-x</sub> catalyst, different drop volume of TH<sup>+</sup>/HEC/Pd-ZnO<sub>1-x</sub> mixture, 1 bar H<sub>2</sub>/O<sub>2</sub>.
